# Supplementary material for: Nephrologist Follow-Up Improves Outcomes After Hospitalization with Acute Kidney Injury
Source: Research Square preprint supplement (doi:10.21203/rs.3.rs-8079590/v1), 2025-12-02
Supplement: Supplementary file 1 [file f39a387cdb4a1ed8f6ea3bea.docx]

**Supplemental Material**

**Supplemental Table 1.** ICD disease codes used in this study

**Supplemental Table 2.** Pre-AKI medication, laboratory data at discharge and event during the index AKI hospitalization of patients

**Supplemental Table 3.** Demographics and clinical characteristics of patients with post-acute kidney injury care at nephrology and non-nephrology outpatient departments after EM missing data imputation and IPTW-adjustment

**Supplemental Table 4.** Pre-AKI medication, laboratory data at discharge and event during the index AKI hospitalization of patients after EM missing data imputation and IPTW-adjustment

**Supplemental Table 5.** Outcomes after AKI during 1 years of follow-up in the IPTW-adjusted cohort stratified by AKI stages

**Supplemental Figure 1.** eGFR levels of patients at 6, 12, 18, and 24 months after discharge from hospitalization for AKI receiving follow-up at nephrology departments versus non-nephrology departments.

AKI: acute kidney injury. eGFR: estimated glomerular filtration rate.

**Supplemental Figure 2.** Comparison of outcomes of discharged patients with AKI receiving follow-up at nephrology departments versus non-nephrology departments stratified by KDIGO AKI stage in IPTW-adjusted cohort.

AKI: acute kidney injury. KDIGO: Kidney Disease: Improving Global Outcomes. IPTW: inverse probability treatment weighting. D-AKI: dialysis-required acute kidney injury. HR: hazard ratio. CI: confidence interval.

**Supplemental Figure 3.** Hazard ratios (nephrology departments versus non-nephrology departments) for primary outcomes in patients with AKI stage III (A) and D-AKI (B).

AKI: acute kidney injury. D-AKI: dialysis-required acute kidney injury.

**Supplemental Figure 4.** Cumulative event rates of all-cause death (A), cardiovascular death (B), readmission with AKI (C), and new-onset dialysis (D) of patients with AKI stage III or D-AKI who received post-AKI care at nephrology departments versus non-nephrology departments in IPTW-adjusted cohort.

AKI: acute kidney injury. IPTW: inverse probability treatment weighting. AKI: acute kidney injury. D-AKI: dialysis-required acute kidney injury. HR: hazard ratio. CI: confidence interval.

**Supplemental Table 1. ICD disease codes used in this study**

| Disease | International Classification of Diseases code |
| --- | --- |
| End stage renal disease | ICD-9: 585.xx  ICD-10: N186 |
| Kidney transplant | ICD-9: V42.0  ICD-10: Z94.0 |
| Glomerular nephritis | ICD-9: 582.xx  ICD-10: N03 |
| Polycystic kidney disease | ICD-9: 753.12, 753.13, 753.14  ICD-10: Q61.1, Q61.2, Q61.3 |
| Multiple myeloma | ICD-9: 203.0, 238.6, 7791.0  ICD-10: C90, C90.0, C90.00, C90.01, C90.02 |
| Monoclonal gammopathy | ICD-9: 273.1, 273.2, 273.9, 289.89  ICD-10: D47.2, C88.0, D89.2 |
| Thrombotic microangiopathy | ICD-9: 446.6x  ICD-10: M31.1 |
| Malignancy | ICD-9: 140.xx-208.xx  ICD-10: C00-C96 |
| Hypertension | ICD-9: 401.xx-405.xx  ICD-10: I10-I15, N262 |
| Diabetes mellitus | ICD-9: 250.xx  ICD-10: E08-E13 |
| Coronary artery disease | ICD-9: 410.xx-414.xx  ICD-10: I20-I24 |
| Atrial fibrillation/flutter | ICD-9: 427.3x  ICD-10: I48 |
| Heart failure | ICD-9: 428.xx  ICD-10: I50 |
| Cerebrovascular disease | ICD-9: 430.xx-437.xx  ICD-10: I60-I62, I66, I65.1, I65.0, I65.8, I65.9, I63.6, I63.8, I63.9, G45.0, G45.8, G45.1, G45.2, G46.0, G46.1, G46.2, G45.9, G45.4, G46.3, G46.4, G46.5, G46.6, G46.7, G46.8, I67.0, I67.1, I67.2, I67.4, I67.5, I67.6, I67.7, I67.9, I68.0, I68.2, I68.8 |
| Peripheral artery disease | ICD-9: 440.xx, 441.xx, 443.xx, 444.0x, 444.8x, 447.8x, 447.9x, 093.0, 437.3, 444.22, 447.1, 557.1, 557.9, V434  ICD-10: I70, I71, I73, I75, I771, I790, I791, I792, I773, I779, I798, K551, K558, K559, Z958, Z959, I743, I744, I745, I748, I740, I7789 |
| Dyslipidemia | ICD-9: 272.xx  ICD-10: E77, E780, E781, E782, E783, E784, E785, E786, E881, E753, E755, E882, E756, E789, E7521, E7522, E7524, E7130, E7879, E7881, E7889, E8889, E7870 |
| Chronic obstructive pulmonary disease | ICD-9: 491.xx, 492.xx, 496.xx  ICD-10: J41-J44 |
| Liver cirrhosis | ICD-9: 571.2, 571.5, 571.6  ICD-10: K74.3, K74.4, K74.5, K74.6, K70.3 |
| Peptic ulcer disease | ICD-9: 531.x-533.x  ICD-10: K25~K27, K31.82 |
| Autoimmune disease | ICD-9: 710.0, 710.1, 714.0, 710.4, 710.3, 446.0, 446.2, 446.4, 446.5, 443.1, 446.7, 136.1, 694.4, 710.2, 555.xx, 556.xx  ICD-10: L10, K51, I731, M057, M058, M059, M060, M061, M062, M063, M068, M069, M300, M301, M302, M308, M310, M314, M315, M316, M317, M320, M328, M329, M340, M341, M342, M349, M352, M360, K5000, K5010, K5080, K5090, M3210, M3219, M3300, M3309, M3310, M3319, M3320, M3329, M3390, M3399, M3489, M3500, M3501, M3509, K50011, K50018, K50019, K50111, K50118, K50119, K50811, K50818, K50819, K50911, K50918, K50919 |

Abbreviation: ICD, The International Classification of Diseases.

**Supplemental Table 2. Pre-AKI medication, laboratory data at discharge and event during the index AKI hospitalization of patients**

| Variable | Available  number | Total  (*n* = 11 290) | Nephrology  (*n* = 2623) | Non-nephrology  (*n* = 8667) | STD |
| --- | --- | --- | --- | --- | --- |
| **Pre-admission medication** |  |  |  |  |  |
| ACEi/ARB/ARNI | 11 290 | 3956 (35.0) | 895 (34.1) | 3061 (35.3) | -0.03 |
| Beta-blocker | 11 290 | 2233 (19.8) | 485 (18.5) | 1748 (20.2) | -0.04 |
| Calcium channel blocker | 11 290 | 3299 (29.2) | 795 (30.3) | 2504 (28.9) | 0.03 |
| Loop diuretics | 11 290 | 3199 (28.3) | 760 (29.0) | 2439 (28.1) | 0.02 |
| Mineralocorticoid receptor antagonists | 11 290 | 1164 (10.3) | 186 (7.1) | 978 (11.3) | -0.15 |
| Thiazide | 11 290 | 760 (6.7) | 146 (5.6) | 614 (7.1) | -0.06 |
| Metformin | 11 290 | 2556 (22.6) | 575 (21.9) | 1981 (22.9) | -0.02 |
| SGLT2i | 11 290 | 40 (0.4) | 10 (0.4) | 30 (0.3) | 0.01 |
| DPP4i | 11 290 | 1272 (11.3) | 353 (13.5) | 919 (10.6) | 0.09 |
| Other oral anti-diabetics agents | 11 290 | 3699 (32.8) | 894 (34.1) | 2805 (32.4) | 0.04 |
| Insulin | 11 290 | 1378 (12.2) | 377 (14.4) | 1001 (11.5) | 0.08 |
| Steroid | 11 290 | 1032 (9.1) | 202 (7.7) | 830 (9.6) | -0.07 |
| Statin | 11 290 | 2778 (24.6) | 693 (26.4) | 2085 (24.1) | 0.05 |
| Fenofibrate | 11 290 | 400 (3.5) | 97 (3.7) | 303 (3.5) | 0.01 |
| Anti-uric acid medication | 11 290 | 1183 (10.5) | 272 (10.4) | 911 (10.5) | <0.01 |
| NSAIDs | 11 290 | 2774 (24.6) | 570 (21.7) | 2204 (25.4) | -0.09 |
| Aspirin | 11 290 | 3001 (26.6) | 617 (23.5) | 2384 (27.5) | -0.09 |
| Clopidogrel | 11 290 | 1227 (10.9) | 208 (7.9) | 1019 (11.8) | -0.13 |
| Anti-coagulant | 11 290 | 720 (6.4) | 100 (3.8) | 620 (7.2) | -0.15 |
| **Laboratory data at discharge** |  |  |  |  |  |
| Hemoglobin, g/dL | 11 141 | 10.7 ± 1.8 | 10.4 ± 1.8 | 10.8 ± 1.8 | -0.22 |
| Sodium, mg/dL | 11 121 | 138.1 ± 4.2 | 138.2 ± 4.1 | 138.1 ± 4.2 | 0.02 |
| Alanine aminotransferase, U/L | 9140 | 28.7 ± 29.9 | 26.8 ± 27.5 | 29.3 ± 30.6 | -0.09 |
| Uric acid, mg/dL | 3390 | 7.9 ± 2.6 | 8.0 ± 2.6 | 7.8 ± 2.7 | 0.06 |
| Albumin, g/dL | 7358 | 3.1 ± 0.6 | 3.0 ± 0.6 | 3.1 ± 0.6 | -0.19 |
| Glucose, mg/dL | 5616 | 192.9 ± 138.1 | 180.9 ± 124.9 | 196.1 ± 141.3 | -0.11 |
| Glycated hemoglobin, % | 2970 | 7.5 ± 2.2 | 7.2 ± 2.0 | 7.6 ± 2.2 | -0.21 |
| Triglyceride, mg/dL | 3310 | 152.5 ± 97.8 | 167.8 ± 107.3 | 147.1 ± 93.7 | 0.21 |
| Total cholesterol, mg/dL | 3609 | 168.1 ± 56.6 | 184.7 ± 70.6 | 162.5 ± 49.6 | 0.36 |
| LDL, mg/dL | 2853 | 98.3 ± 44.5 | 110.4 ± 54.6 | 94.2 ± 39.7 | 0.34 |
| **Events during the index AKI admission** |  |  |  |  |  |
| Intensive care unit care | 11 290 | 3262 (28.9) | 571 (21.8) | 2,691 (31.0) | -0.21 |
| Mechanical ventilation | 11 290 | 2301 (20.4) | 406 (15.5) | 1,895 (21.9) | -0.16 |
| Inotropic agents usage | 11 290 | 2246 (19.9) | 384 (14.6) | 1,862 (21.5) | -0.18 |
| Sepsis/Infection | 11 290 | 5897 (52.2) | 1326 (50.6) | 4,571 (52.7) | -0.04 |
| Major bleeding | 11 290 | 791 (7.0) | 172 (6.6) | 619 (7.1) | -0.02 |
| Department | 11 290 |  |  |  |  |
| Cardiology |  | 2516 (22.3) | 370 (14.1) | 2146 (24.8) | -0.27 |
| Chest |  | 877 (7.8) | 145 (5.5) | 732 (8.4) | -0.11 |
| Gastroenterology |  | 837 (7.4) | 128 (4.9) | 709 (8.2) | -0.13 |
| Nephrology |  | 1383 (12.2) | 1185 (45.2) | 198 (2.3) | 1.17 |
| Cardiovascular chest surgery |  | 894 (7.9) | 132 (5.0) | 762 (8.8) | -0.15 |
| General surgery |  | 624 (5.5) | 92 (3.5) | 532 (6.1) | -0.12 |
| Orthopedics |  | 729 (6.5) | 75 (2.9) | 654 (7.5) | -0.21 |
| Others |  | 3430 (30.4) | 496 (18.9) | 2934 (33.9) | -0.34 |
| Duration of AKI admission, day | 11 290 | 22.5 ± 22.5 | 21.0 ± 20.3 | 22.9 ± 23.2 | -0.09 |

Abbreviation: EM, expectation maximization; GBM, generalized boosted modeling; IPTW, inverse probability treatment weighting; STD, standardized difference; ACEi, angiotensin converting enzyme inhibitor; ARB, angiotensin receptor blocker; ARNI, angiotensin receptor-neprilysin inhibitor; SGLT2i, sodium-glucose co-transporter 2 inhibitor; DPP4i, dipeptidyl peptidase-4 inhibitor; NSAID, non-steroidal anti-inflammatory drug; LDL, low density lipoprotein cholesterol.

Data were summarized as mean ± standard deviation or frequency (percentage) before EM imputation and GBM-IPTW.

**Supplemental Table 3. Demographics and clinical characteristics of patients with post-acute kidney injury care at nephrology and non-nephrology outpatient departments after EM missing data imputation and IPTW-adjustment**

| Variable | Nephrology  (*n* = 10 102.5) | Non-nephrology  (*n* = 10 916.6) | STD |
| --- | --- | --- | --- |
| **Demographics** |  |  |  |
| Male | 51.6 | 49.4 | 0.04 |
| Age, year | 69.2 ± 13.9 | 69.8 ± 14.1 | -0.04 |
| Body mass index, kg/m2 | 23.4 ± 2.3 | 23.2 ± 2.4 | 0.06 |
| **Comorbidities** |  |  |  |
| Hypertension | 72.9 | 68.1 | 0.11 |
| Diabetes mellitus | 55.4 | 51.5 | 0.08 |
| Coronary artery disease | 30.0 | 32.6 | -0.06 |
| Atrial fibrillation/flutter | 10.9 | 13.5 | -0.08 |
| Heart failure | 10.8 | 13.1 | -0.07 |
| Cerebrovascular disease | 13.4 | 13.2 | 0.01 |
| Peripheral artery disease | 10.9 | 11.9 | -0.03 |
| Dyslipidemia | 37.0 | 34.2 | 0.06 |
| Chronic obstructive pulmonary disease | 16.2 | 17.3 | -0.03 |
| Liver cirrhosis | 8.0 | 7.5 | 0.02 |
| Peptic ulcer disease | 32.0 | 29.8 | 0.05 |
| Autoimmune disease | 3.6 | 4.6 | -0.05 |
| **Renal function** |  |  |  |
| Serum creatinine at discharge, mg/dL | 2.0 ± 1.4 | 1.9 ± 1.2 | 0.11 |
| eGFR at discharge, mL/min/1.73m2 | 38.5 ± 14.1 | 40.0 ± 13.5 | -0.11 |
| Proteinuria at discharge |  |  |  |
| Negative | 29.0 | 34.1 | -0.11 |
| Trace | 14.2 | 14.6 | -0.01 |
| 1+ | 18.6 | 16.9 | 0.04 |
| 2+ | 22.2 | 21.2 | 0.02 |
| 3+ | 12.5 | 11.1 | 0.04 |
| 4+ | 3.6 | 2.2 | 0.08 |
| KDIGO AKI stage |  |  |  |
| 1 | 46.0 | 48.5 | -0.05 |
| 2 | 26.9 | 27.8 | -0.02 |
| 3 | 20.5 | 18.6 | 0.05 |
| D-AKI | 6.7 | 5.1 | 0.07 |
| Elevated of serum creatinine at discharge >50% compared to baseline serum creatinine | 38.6 | 38.5 | <0.01 |
| Follow-up year | 4.4 ± 3.4 | 4.4 ± 3.5 | <0.01 |

Abbreviation: EM, expectation maximization; IPTW, inverse probability treatment weighting; STD, standardized difference; eGFR, estimated glomerular filtration rate; KDIGO, Kidney Disease Improving Global Outcomes; AKI, acute kidney injury; D-AKI, dialysis-required acute kidney injury.

Data were summarized as mean ± standard deviation or percentage.

**Supplemental Table 4.** **Pre-AKI medication, laboratory data at discharge and event during the index AKI hospitalization of patients after EM missing data imputation and IPTW-adjustment**

| Variable | Nephrology  (*n* = 10 102.5) | Non-nephrology  (*n* = 10 916.6) | STD |
| --- | --- | --- | --- |
| **Pre-admission medication** |  |  |  |
| ACEi/ARB/ARNI | 38.4 | 34.9 | 0.07 |
| Beta-blocker | 21.3 | 19.8 | 0.04 |
| Calcium channel blocker | 31.7 | 29.3 | 0.05 |
| Loop diuretics | 30.5 | 27.5 | 0.07 |
| Mineralocorticoid receptor antagonists | 8.8 | 10.9 | -0.07 |
| Thiazide | 6.8 | 7.0 | -0.01 |
| Metformin | 22.9 | 23.0 | <0.01 |
| SGLT2i | 0.7 | 0.4 | 0.04 |
| DPP4i | 13.3 | 10.8 | 0.08 |
| Other oral anti-diabetics agents | 34.9 | 32.8 | 0.04 |
| Insulin | 14.2 | 12.0 | 0.07 |
| Steroid | 9.8 | 9.8 | <0.01 |
| Statin | 26.4 | 24.6 | 0.04 |
| Fenofibrate | 4.0 | 3.4 | 0.03 |
| Anti-uric acid medication | 13.1 | 10.6 | 0.08 |
| NSAIDs | 27.3 | 25.0 | 0.05 |
| Aspirin | 27.1 | 27.3 | -0.01 |
| Clopidogrel | 10.0 | 11.3 | -0.04 |
| Anti-coagulant | 5.6 | 6.9 | -0.05 |
| **Lab**o**ratory data at discharge** |  |  |  |
| Hemoglobin, g/dL | 10.6 ± 1.8 | 10.7 ± 1.8 | -0.03 |
| Sodium, mg/dL | 138.2 ± 4.2 | 138.1 ± 4.2 | 0.04 |
| Alanine aminotransferase, U/L | 27.7 ± 26.8 | 28.8 ± 30.2 | -0.04 |
| Uric acid, mg/dL | 7.7 ± 2.5 | 7.9 ± 2.6 | -0.05 |
| Albumin, g/dL | 3.1 ± 0.6 | 3.1 ± 0.6 | -0.07 |
| Glucose, mg/dL | 187.5 ± 129.2 | 195.0 ± 139.5 | -0.06 |
| Glycated hemoglobin, % | 7.4 ± 2.0 | 7.6 ± 2.2 | -0.11 |
| Triglyceride, mg/dL | 157.2 ± 102.0 | 149.9 ± 94.5 | 0.07 |
| Total cholesterol, mg/dL | 172.4 ± 58.3 | 165.7 ± 53.6 | 0.12 |
| LDL, mg/dL | 101.1 ± 45.4 | 96.5 ± 42.5 | 0.11 |
| **Events during the index AKI admission** |  |  |  |
| Intensive care unit care | 27.1 | 29.4 | -0.05 |
| Mechanical ventilation | 19.1 | 20.7 | -0.04 |
| Inotropic agents usage | 18.1 | 20.5 | -0.06 |
| Sepsis/Infection | 51.6 | 53.4 | -0.03 |
| Major bleeding | 7.6 | 7.1 | 0.02 |
| Department |  |  |  |
| Cardiology | 21.6 | 22.8 | -0.03 |
| Chest | 8.4 | 7.9 | 0.02 |
| Gastroenterology | 8.2 | 7.6 | 0.02 |
| Nephrology | 13.9 | 9.6 | 0.13 |
| Cardiovascular chest surgery | 7.2 | 8.1 | -0.04 |
| General surgery | 5.5 | 5.7 | -0.01 |
| Orthopedics | 5.6 | 6.8 | -0.05 |
| Others | 29.6 | 31.5 | -0.04 |
| Duration of AKI admission, day | 22.1 ± 23.0 | 22.7 ± 23.4 | -0.02 |

Abbreviation: EM, expectation maximization; GBM, generalized boosted modeling; IPTW, inverse probability treatment weighting; STD, standardized difference; ACEi, angiotensin converting enzyme inhibitor; ARB, angiotensin receptor blocker; ARNI, angiotensin receptor-neprilysin inhibitor; SGLT2i, sodium-glucose co-transporter 2 inhibitor; DPP4i, dipeptidyl peptidase-4 inhibitor; NSAID, non-steroidal anti-inflammatory drug; LDL, low density lipoprotein cholesterol.

Data were summarized as mean ± standard deviation or percentage after EM imputation and GBM-IPTW.

**Supplemental Table 5. Outcomes after AKI during 1 years of follow-up in the IPTW-adjusted cohort stratified by AKI stages**

|  | Nephrology (*n* = 10 102.5) | |  | Non-nephrology (*n* = 10 916.6) | | HR (95% CI) of  Nephrology |  |
| --- | --- | --- | --- | --- | --- | --- | --- |
| AKI stage / Outcome | Event (%) | Incidence (95% CI)† | Event (%) | Incidence (95% CI)† | *P* value |
| **Stage 1** |  |  |  |  |  |  |  |
| All-cause death | 7.6 | 7.8 (7.0–8.7) |  | 7.7 | 8.0 (7.2–8.8) | 0.98 (0.85–1.13) | .760 |
| Cardiovascular death | 3.0 | 3.1 (2.6–3.7) |  | 2.3 | 2.3 (1.9–2.8) | 1.33 (1.05–1.70) | .021 |
| Heart failure hospitalization | 6.6 | 7.0 (6.2–7.8) |  | 7.1 | 7.4 (6.7–8.2) | 0.93 (0.80–1.09) | .377 |
| Readmission with AKI | 9.0 | 9.5 (8.6–10.5) |  | 11.1 | 11.8 (10.8–12.8) | 0.81 (0.71–0.92) | <.001 |
| New-onset dialysis | 2.1 | 42.1 (33.8–50.3) |  | 0.2 | 6.0 (2.5–9.5) | 7.07 (3.79–13.18) | <.001 |
| **Stage 2** |  |  |  |  |  |  |  |
| All-cause death | 9.5 | 9.8 (8.6–11.0) |  | 9.4 | 9.7 (8.6–10.9) | 1.00 (0.85–1.19) | .961 |
| Cardiovascular death | 1.3 | 1.4 (0.9–1.8) |  | 3.0 | 3.1 (2.4–3.7) | 0.44 (0.30–0.65) | <.001 |
| Heart failure hospitalization | 5.8 | 6.1 (5.1–7.0) |  | 6.8 | 7.2 (6.2–8.2) | 0.84 (0.68–1.03) | .095 |
| Readmission with AKI | 11.0 | 11.7 (10.3–13.0) |  | 10.7 | 11.5 (10.2–12.7) | 1.01 (0.86–1.18) | .898 |
| New-onset dialysis | 3.1 | 44.2 (34.7–53.7) |  | 0.7 | 17.9 (10.2–25.5) | 2.48 (1.53–4.01) | <.001 |
| **Stage 3** |  |  |  |  |  |  |  |
| All-cause death | 6.5 | 6.6 (5.5–7.8) |  | 10.3 | 10.8 (9.3–12.3) | 0.60 (0.48–0.75) | <.001 |
| Cardiovascular death | 1.7 | 1.7 (1.1–2.3) |  | 3.2 | 3.3 (2.5–4.1) | 0.51 (0.34–0.77) | .001 |
| Heart failure hospitalization | 6.2 | 6.4 (5.3–7.6) |  | 5.0 | 5.2 (4.2–6.3) | 1.21 (0.93–1.57) | .158 |
| Readmission with AKI | 7.5 | 7.8 (6.6–9.1) |  | 10.2 | 11.0 (9.5–12.5) | 0.69 (0.56–0.85) | <.001 |
| New-onset dialysis | 5.0 | 67.8 (54.7–80.8) |  | 0.3 | 10.7 (2.8–18.6) | 5.84 (2.72–12.55) | <.001 |
| **D-AKI** |  |  |  |  |  |  |  |
| All-cause death | 5.0 | 5.1 (3.4–6.9) |  | 12.8 | 13.6 (10.4–16.8) | 0.37 (0.25–0.56) | <.001 |
| Cardiovascular death | 1.2 | 1.2 (0.4–2.0) |  | 2.4 | 2.6 (1.2–3.9) | 0.46 (0.19–1.10) | .082 |
| Heart failure hospitalization | 5.4 | 5.6 (3.8–7.4) |  | 4.9 | 5.2 (3.3–7.2) | 1.04 (0.63–1.71) | .889 |
| Readmission with AKI | 6.6 | 7.0 (4.9–9.0) |  | 10.9 | 11.8 (8.8–14.8) | 0.57 (0.39–0.84) | .005 |
| New-onset dialysis | 8.7 | 91.0 (67.6–114.3) |  | 7.8 | 227.1 (159.2–295.0) | 0.44 (0.30–0.66) | <.001 |
| **All AKI stages** |  |  |  |  |  |  |  |
| All-cause death | 7.7 | 7.9 (7.4–8.5) |  | 8.9 | 9.3 (8.7–9.9) | 0.85 (0.77–0.93) | <.001 |
| Cardiovascular death | 2.2 | 2.2 (1.9–2.5) |  | 2.6 | 2.7 (2.4–3.1) | 0.81 (0.68–0.97) | .019 |
| Heart failure hospitalization | 6.2 | 6.5 (6.0–7.0) |  | 6.5 | 6.9 (6.4–7.4) | 0.95 (0.85–1.05) | .302 |
| Readmission with AKI | 9.1 | 9.6 (9.0–10.2) |  | 10.8 | 11.6 (10.9–12.2) | 0.82 (0.75–0.90) | <.001 |
| New-onset dialysis | 3.4 | 53.7 (48.0–59.3) |  | 0.8 | 21.3 (16.6–25.9) | 0.85 (0.77–0.93) | <.001 |

Abbreviation: HR, hazard ratio; CI, confidence interval; AKI, acute kidney injury; D-AKI, dialysis-required acute kidney injury;

† Number of events per 100 person-years.

**Supplemental Figure 1.** eGFR levels of patients at 6, 12, 18, and 24 months after discharge from hospitalization for AKI receiving follow-up at nephrology departments versus non-nephrology departments.


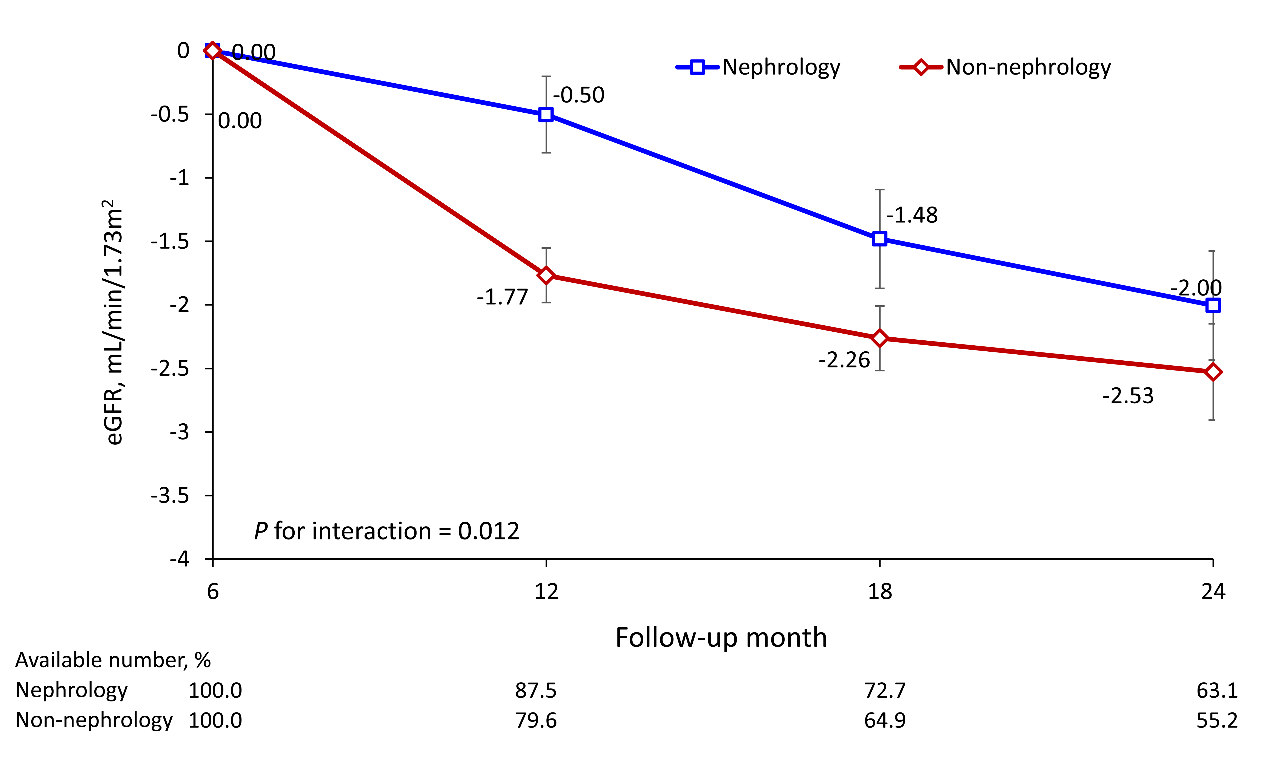


AKI: acute kidney injury. eGFR: estimated glomerular filtration rate.

**Supplemental Figure 2.** Comparison of outcomes of discharged patients with AKI receiving follow-up at nephrology departments versus non-nephrology departments stratified by KDIGO AKI stage in IPTW-adjusted cohort.


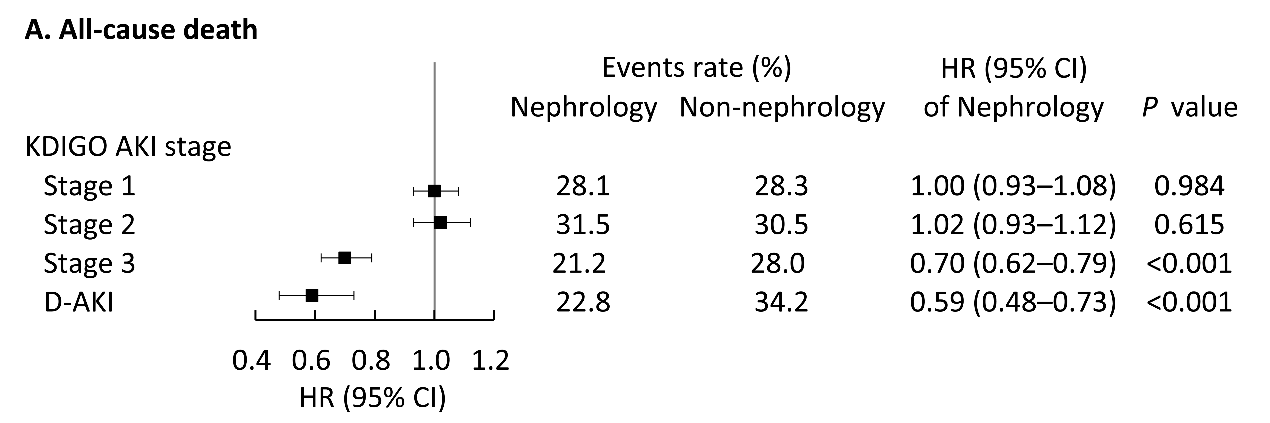

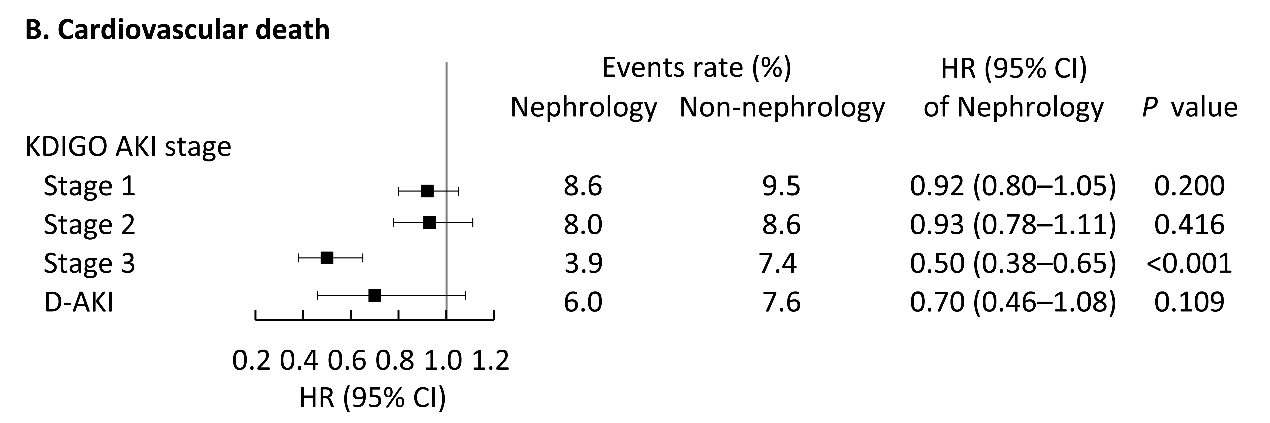

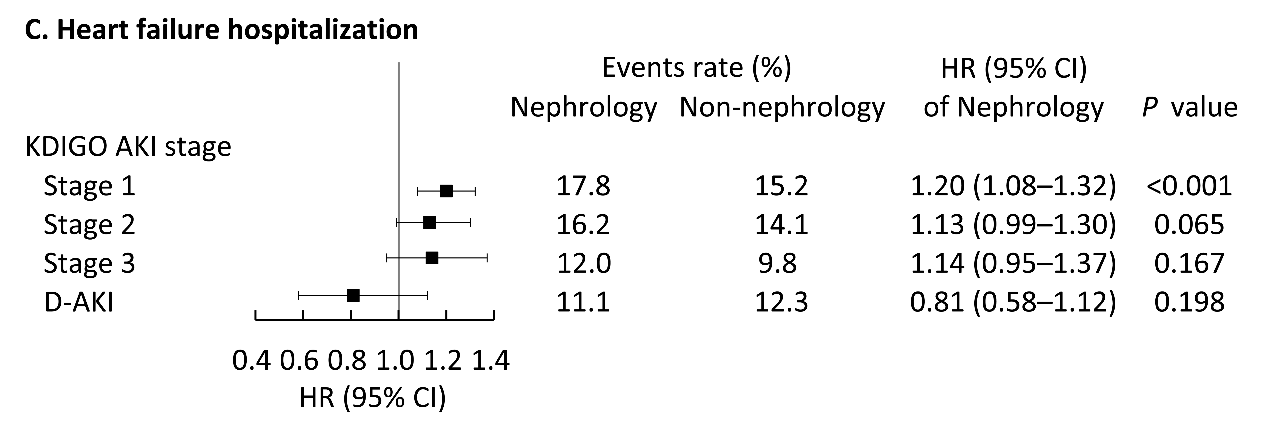

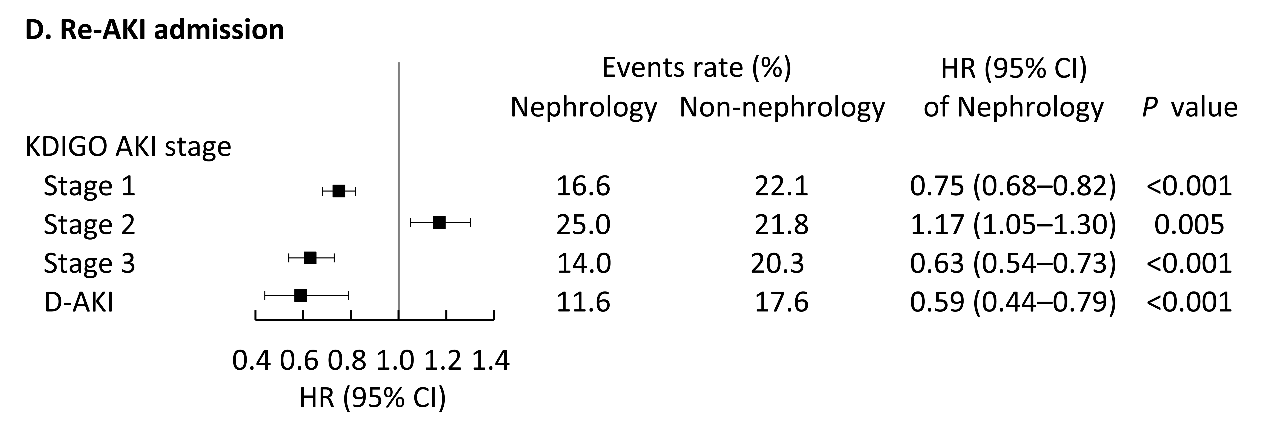

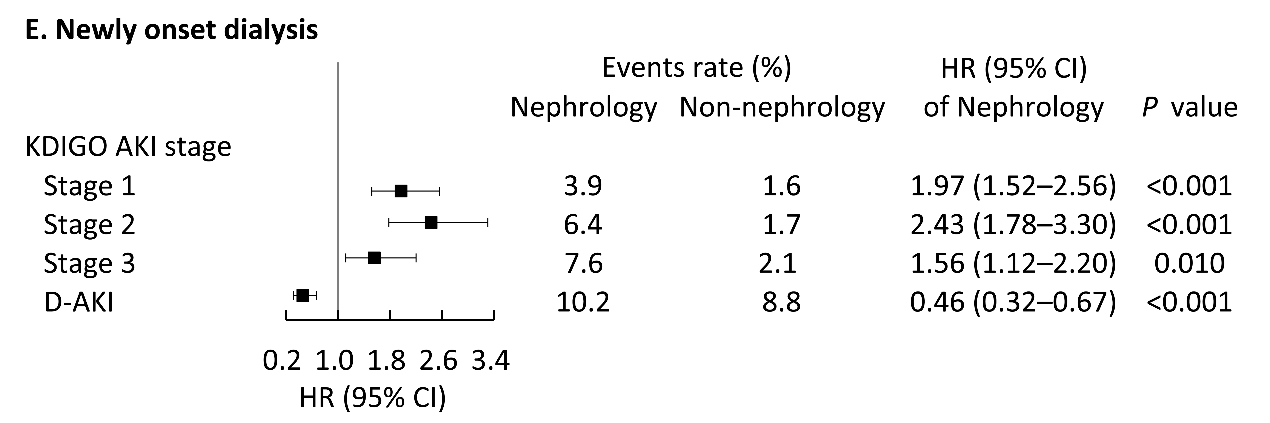


AKI: acute kidney injury. KDIGO: Kidney Disease: Improving Global Outcomes. IPTW: inverse probability treatment weighting. D-AKI: dialysis-required acute kidney injury. HR: hazard ratio. CI: confidence interval.

**Supplemental Figure 3.** Hazard ratios (nephrology departments versus non-nephrology departments) for primary outcomes in patients with AKI stage III (A) and D-AKI (B).


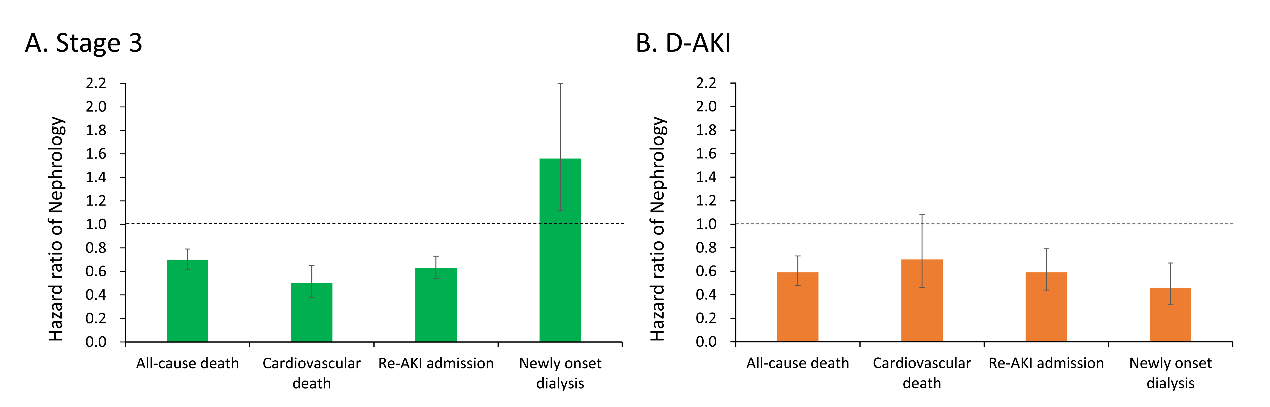


AKI: acute kidney injury. D-AKI: dialysis-required acute kidney injury.

**Supplemental Figure 4.** Cumulative event rates of all-cause death (A), cardiovascular death (B), readmission with AKI (C), and new-onset dialysis (D) of patients with AKI stage III or D-AKI who received post-AKI care at nephrology departments versus non-nephrology departments in IPTW-adjusted cohort.


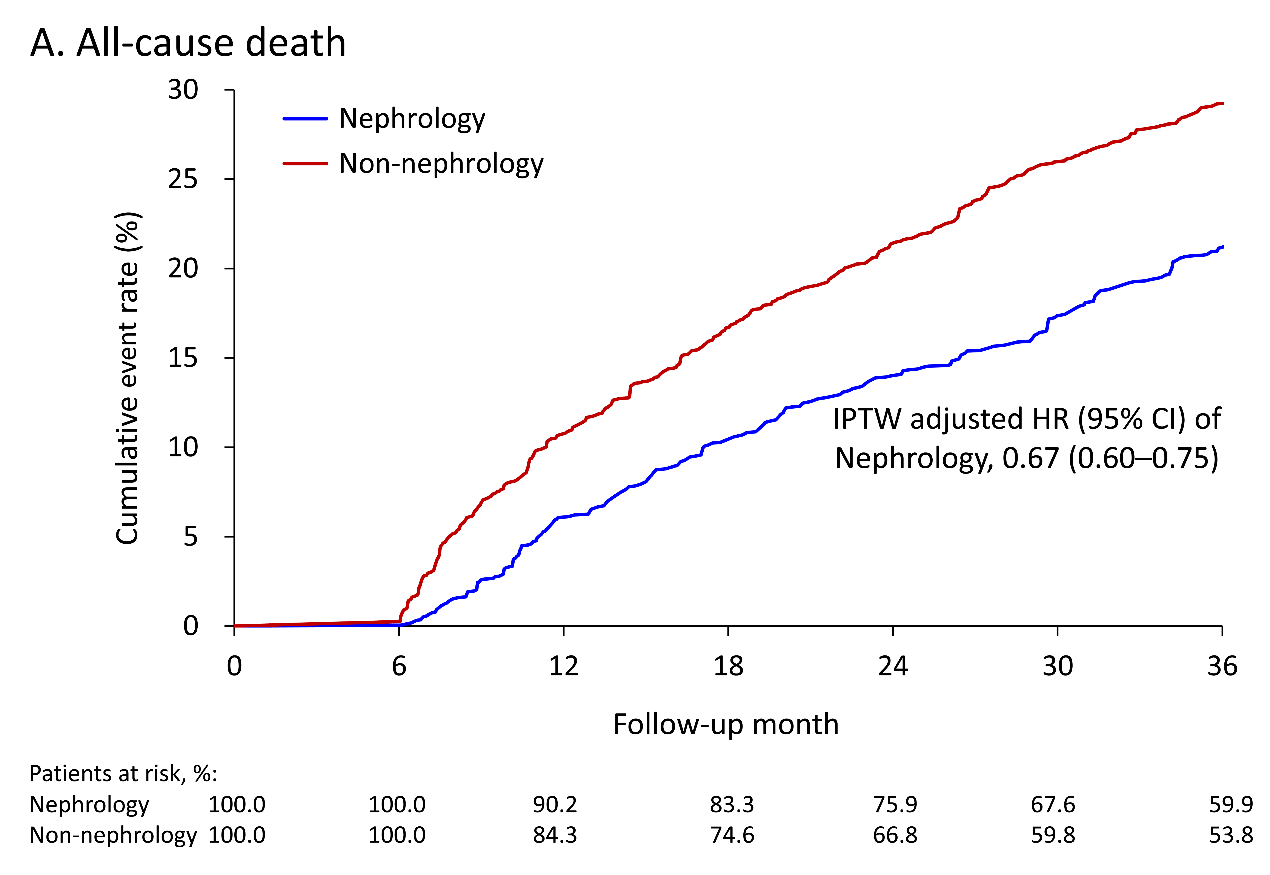

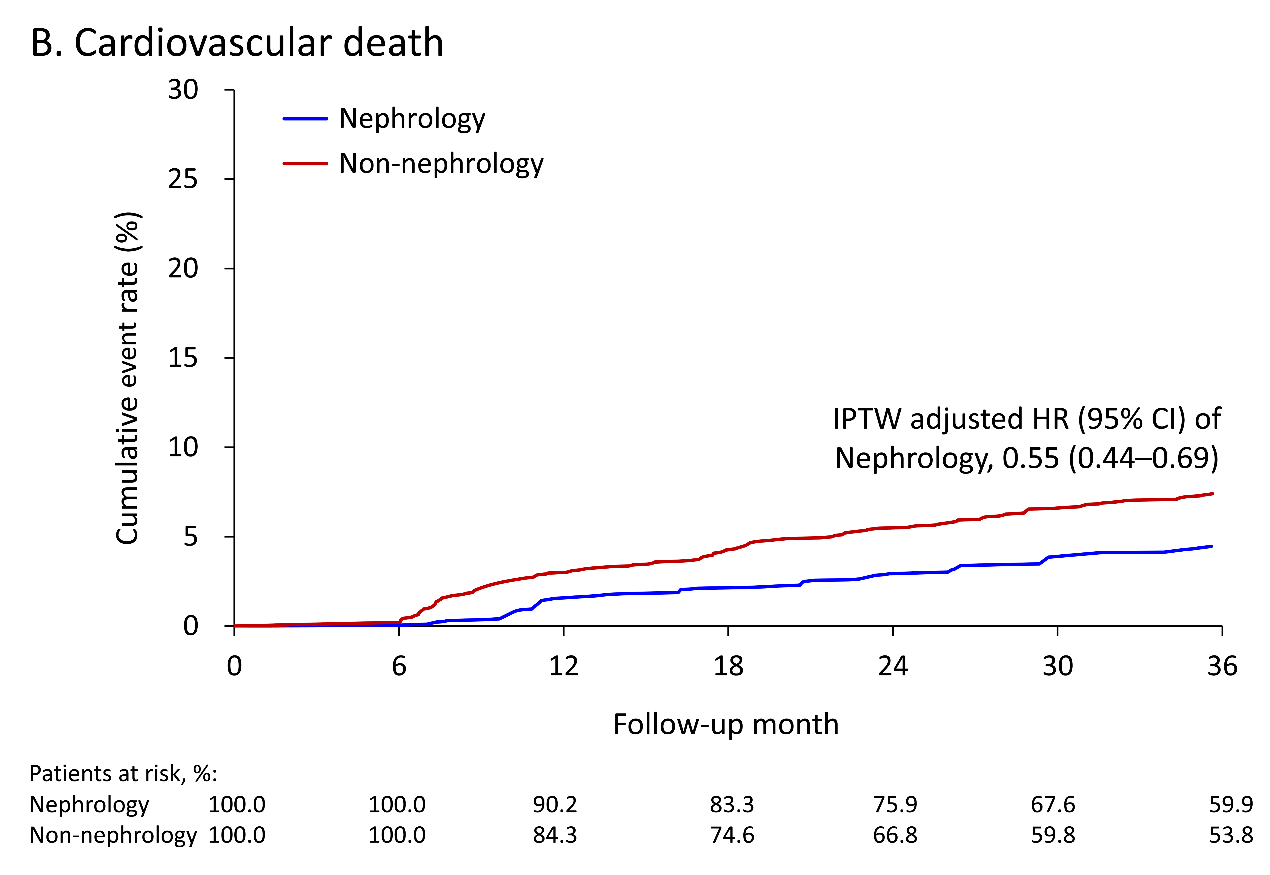

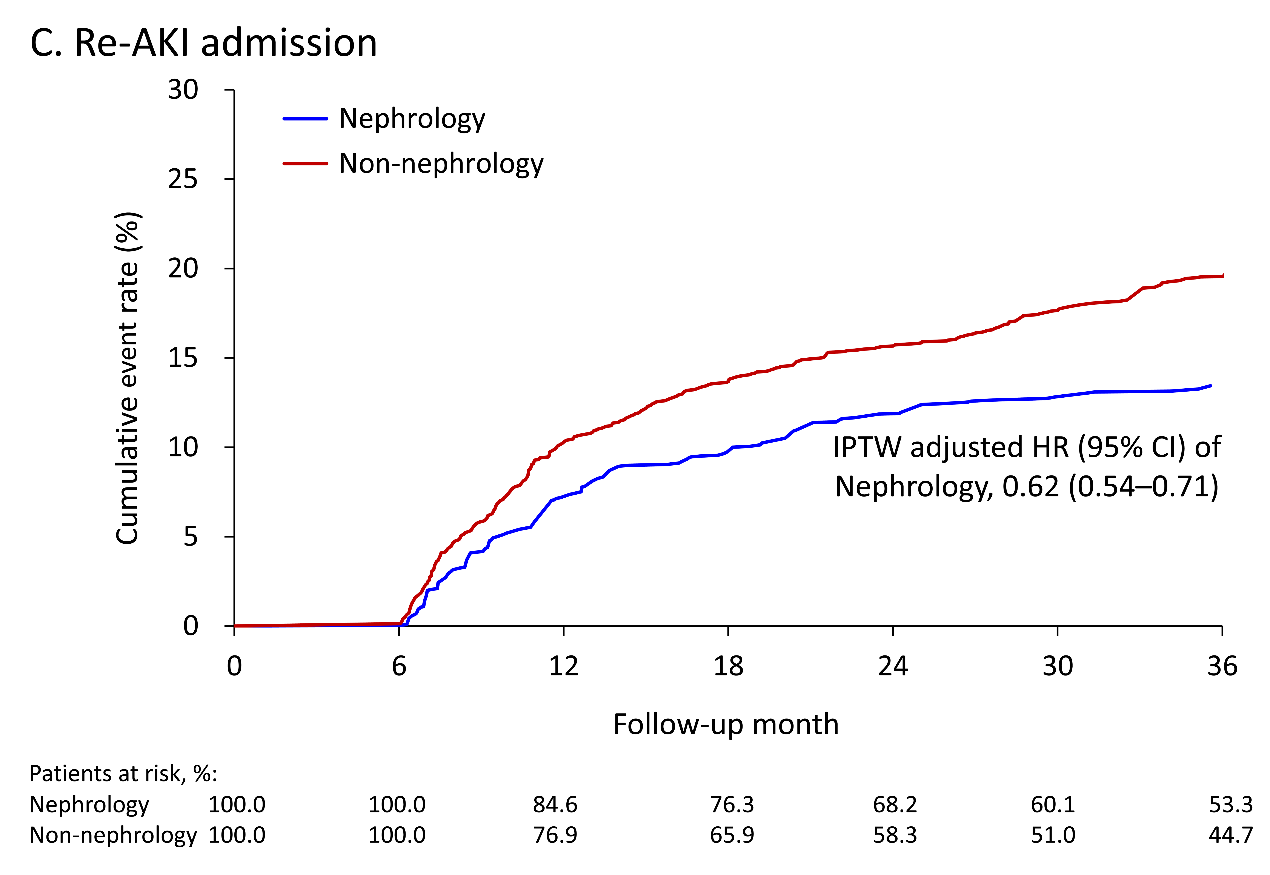

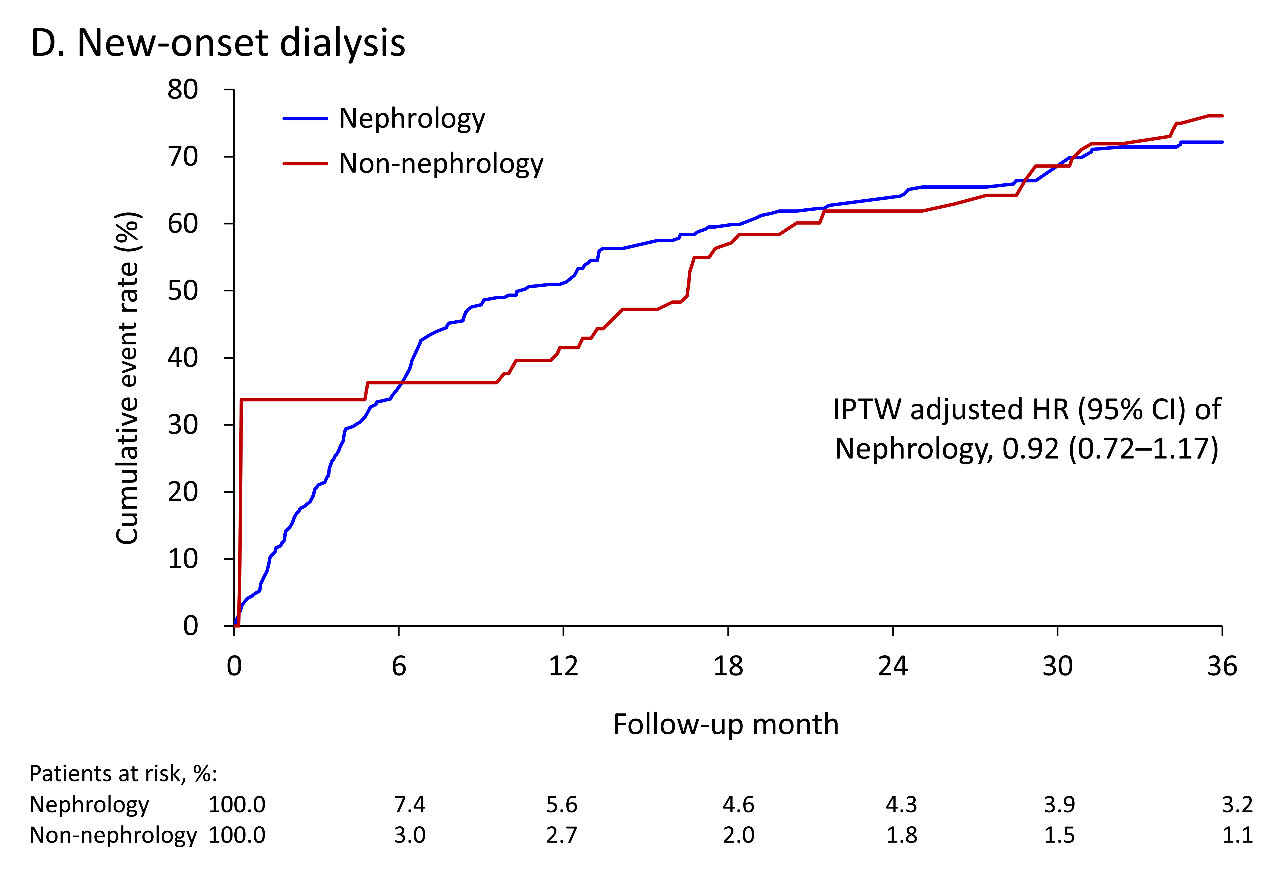


AKI: acute kidney injury. IPTW: inverse probability treatment weighting. AKI: acute kidney injury. D-AKI: dialysis-required acute kidney injury. HR: hazard ratio. CI: confidence interval.
